# Supplementary material
Source: Springer Nature journal article supplement (https://www.springermedizin.de/resource/supplementary/13054_2011_600_MOESM1_ESM.pdf/9708826)

EAA value

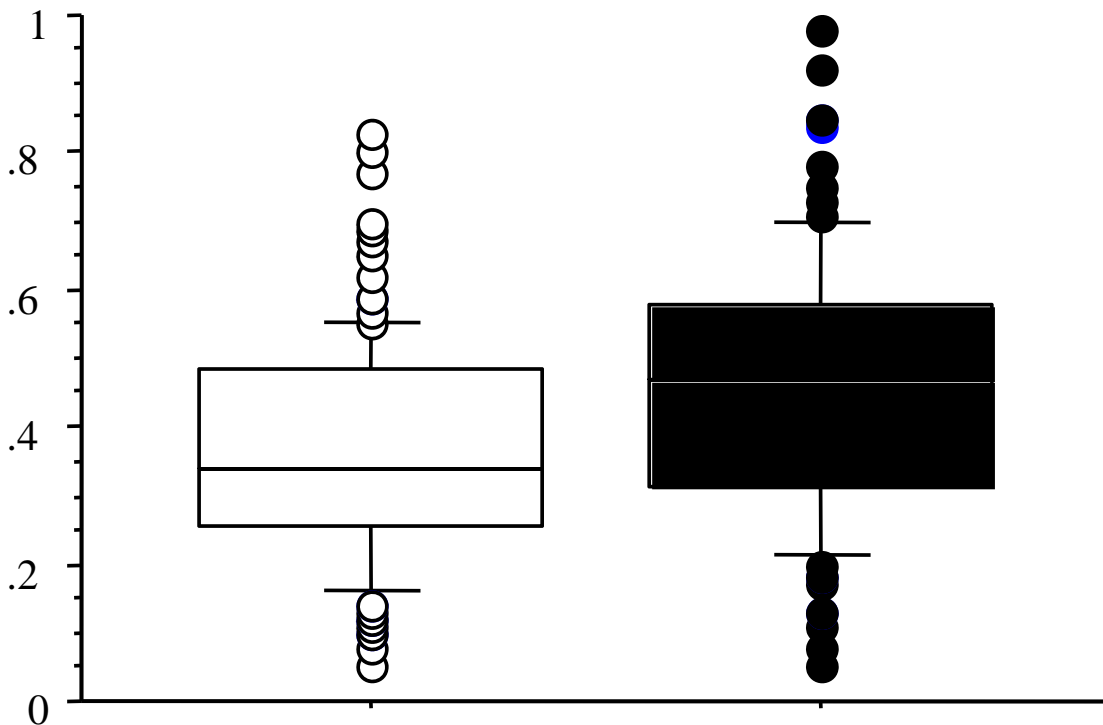

No Gram negative  
organisms  
(n=118)

Gram negative  
organism in cultures  
(n=92)

Supplement: MOESM1 [file 9708826]
